# Supplementary material
Source: Springer Nature journal article supplement (https://www.springermedizin.de/resource/supplementary/12894_2013_283_MOESM2_ESM.pdf/9513374)
Supplement: MOESM2 [file 9513374]

2298 registered studies involving prostatic neoplasms

1413 studies with start dates between 2005 and 2011

885 studies with other start dates excluded

1413 studies screened

469 RCTs  
416 Non-RCTs

1980 registered studies involving kidney neoplasms

1251 studies with start dates between 2005 and 2011

729 studies with other start dates excluded

1251 studies screened

385 RCTs  
866 Non-RCTs

590 registered studies involving urinary bladder neoplasms

354 studies with start dates between 2005 and 2011

236 studies with other start dates excluded

354 studies screened

98 RCTs  
256 Non-RCTs

224 registered studies involving testicular neoplasms

96 studies with start dates between 2005 and 2011

128 studies with other start dates excluded

96 studies screened

19 RCTs  
77 Non-RCTs
